## CORRECTION

# Correction: Voluntary and spontaneous facial mimicry toward other's emotional expression in patients with Parkinson's disease

June Kang, Dilara Derva, Do-Young Kwon, Christian Wallraven

In the Stimulus subsection of the Materials and methods section, there is an incorrect reference in the third sentence.

The correct sentence is: Expression stimuli were chosen from the East-Asian Dynamic Facial Expression Stimulus (EADFES) database (Kang et al., 2015), which contains stimuli created and verified based on suggested action units related to each emotion (Anger: 4CDE+5CED+7+17+23/24, Joy: 6+12CDE+25, Sad: 1+4+15ABC+17, [38]).

The reference is: Kang J, Ham BJ. Development and Validation of East-Asian Dynamic Facial Expression Stimulus. Proceedings of Current Trends in Biomedical Science. 2015. Seoul, South Korea.

## Reference

1. Kang J, Derva D, Kwon D-Y, Wallraven C (2019) Voluntary and spontaneous facial mimicry toward other's emotional expression in patients with Parkinson's disease. PLoS ONE 14(4): e0214957. <https://doi.org/10.1371/journal.pone.0214957> PMID: 30973893

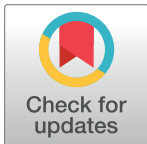

## OPEN ACCESS

**Citation:** Kang J, Derva D, Kwon D-Y, Wallraven C (2019) Correction: Voluntary and spontaneous facial mimicry toward other's emotional expression in patients with Parkinson's disease. PLoS ONE 14(5): e0217715. <https://doi.org/10.1371/journal.pone.0217715>

**Published:** May 28, 2019

**Copyright:** © 2019 Kang et al. This is an open access article distributed under the terms of the [Creative Commons Attribution License](https://creativecommons.org/licenses/by/4.0/), which permits unrestricted use, distribution, and reproduction in any medium, provided the original author and source are credited.
